# Supplementary material for: Surface Alterations on Agro-Waste Filler and their Effect on the Properties of Biodegradable Polybutylene adipate-co-terephthalate (PBAT)
Source: Research Square preprint supplement (doi:10.21203/rs.3.rs-4208294/v1), 2024-04-12
Supplement: Supplementary file 1 [file 76e27a38f7918902634766e2.docx]

**Surface Alterations on Agro-Waste Filler and their Effect on the Properties of Biodegradable Polybutylene adipate-co-terephthalate (PBAT)**

**Niresha Perumal1, Srimala Sreekantan1*, Zuratul Ain Abdul Hamid1, Kesaven Bhubalan2,3, Muhammad Fadhirul Izwan Abdul Malik4, Anwar Iqbal5**

*1School of Materials and Mineral Resources Engineering, Engineering Campus, Universiti Sains Malaysia, 14300 Nibong Tebal, Penang, Malaysia*

*2Faculty of Science and Marine Environment, Universiti Malaysia Terengganu, Kuala Nerus 21030, Malaysia*

*3Institute of Marine Biotechnology, Universiti Malaysia Terengganu, Kuala Nerus 21030, Malaysia*

*4Science and Engineering Research Centre (SERC), Engineering Campus, Universiti Sains Malaysia, 14300 Nibong Tebal, Penang, Malaysia*

*5School of Chemical Science, Universiti Sains Malaysia, 11800 Penang, Malaysia*

**Corresponding author. E-mail address: srimala@usm.my (SS)*

**Graphical Abstract**

**
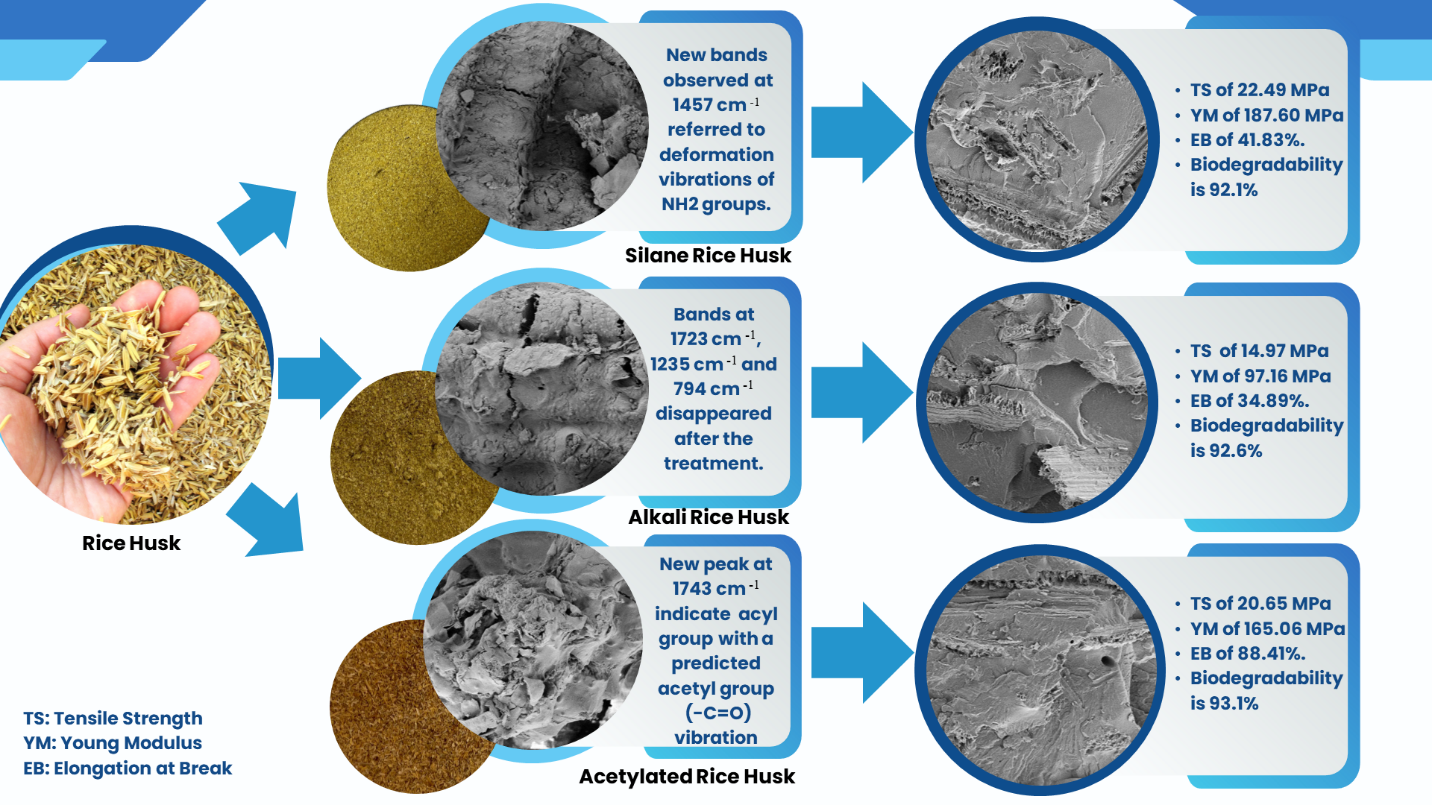
**
