# Supplementary material for: Surface Alterations on Agro-Waste Filler and their Effect on the Properties of Biodegradable Polybutylene adipate-co-terephthalate (PBAT)
Source: Research Square preprint supplement (doi:10.21203/rs.3.rs-4208294/v1), 2024-04-12
Supplement: Supplementary file 2 [file c174b91c3819af57943fd7e2.docx]

**Surface Alterations on Agro-Waste Filler and their Effect on the Properties of Biodegradable Polybutylene adipate-co-terephthalate (PBAT)**

**Niresha Perumal1, Srimala Sreekantan1*, Zuratul Ain Abdul Hamid1, Kesaven Bhubalan2,3, Muhammad Fadhirul Izwan Abdul Malik4, Anwar Iqbal5**

*1School of Materials and Mineral Resources Engineering, Engineering Campus, Universiti Sains Malaysia, 14300 Nibong Tebal, Penang, Malaysia*

*2Faculty of Science and Marine Environment, Universiti Malaysia Terengganu, Kuala Nerus 21030, Malaysia*

*3Institute of Marine Biotechnology, Universiti Malaysia Terengganu, Kuala Nerus 21030, Malaysia*

*4Science and Engineering Research Centre (SERC), Engineering Campus, Universiti Sains Malaysia, 14300 Nibong Tebal, Penang, Malaysia*

*5School of Chemical Science, Universiti Sains Malaysia, 11800 Penang, Malaysia*

**Corresponding author. E-mail address: srimala@usm.my (SS)*

**Supplementary Materials**

**Table 1** Summary of Various Chemical Treatments of Fillers in Polymer Composites.

| Author | Composites | Ratio | Treatment on fillers | Tensile strength (MPa) | Young Modulus  (MPa) | Elongation at break  (%) | Soil Burial test  (%) | Reference |
| --- | --- | --- | --- | --- | --- | --- | --- | --- |
| Hu et al. (2007) | PLA/Hemp fiber | 70/30  60/40  50/50  70/30  60/40  50/50 | -  -  -  Alkali (6% solution of NaOH) | 41.14  44.63  43.73  39.29  54.60  41.77 | 5652.5  7399.5  7030.8  7631.0  8489.6  7012.3 | N/A | N/A | [24] |
| Fávaro et al. (2010) | rHDPE/RH | 95/5  90/10  95/5  90/10 | -  -  Acetylation (acetic acid, acetic anhydride, and 0.1% sulphuric acid) | 20.0  19.5  19.5  19.4 | 470  570  495  525 | N/A | N/A | [25] |
| Ragunathan et al. (2011) | PP/NBRr/RHP | 70/30/5  70/30/10  70/30/15  70/30/30  70/30/5  70/30/10  70/30/15  70/30/30 | -  -  -  -  Silane (3 wt% of γ- aminopropyltrimethoxysilane) | 13  12.9  12.3  10.5  17.6  16.8  15.9  13.5 | 1070  1075  1120  1140  1315  1350  1348  1430 | 6.2  5.5  4.4  4.3  4.6  5.0  3.7  3.3 | N/A | [26] |
| Yeh et al. (2015) | PP/RH | 50/50  50/50  50/50 | -  Alkali (10 wt% NaOH)  Silane (3 wt% of 3-aminopropyltriethoxysilane) | 17.76  18.68  17.74 | 2134  2124  2110 | N/A | N/A | [27] |
| Yeh et al. (2015) | PP/RH/PP-g-MA | 50/50/2  50/50/2  50/50/2 | -  Alkali (10 wt% NaOH)  Silane (3 wt% of 3-aminopropyltriethoxysilane) | 24.46  22.47  21.92 | 2135  2362  2284 | N/A | N/A | [27] |
| Zahari et al. (2015) | PP/ijuk fiber | 100/0  90/10  80/20  70/30  90/10  80/20  70/30 | -  -  -  -  Silane (vinyltrimethoxysilane) | 17.45  17.57  18.36  19.71  20.21  20.27  23.00 | 298.14  361.32  720.24  1052.40  1051.84  1066.30  1098.51 | 0.106 mm  0.079 mm  0.059 mm  0.052 mm  0.084 mm  0.065 mm  0.051mm | N/A | [28] |
| Moustafa et al. (2017) | PBAT/CG | 100/0  90/10  80/20  70/30  90/10  80/20  70/30 | -  -  -  -  Torrefaction at 270°C | 14.3 ± 21.2  11.1 ± 1.6  7.4 ± 2.1  6.8 ± 1.7  18.2 ± 1.4  12.9 ± 1.6  8.7 ± 2.2 | N/A | 1545 ± 63  340 ± 4.2  220 ± 5.1  98 ± 7.4  1150 ± 7.9  910 ± 5.9  580 ± 8.4 | N/A | [29] |
| Moura et al. (2018) | PHB/RH | 100/0  90/10  80/20  90/10  80/20 | -  -  -  Hot water treatment | 9.5 ± 3.11  14.0 ± 1.63  13.2 ± 2.17  11.1 ± 3.43  16.1 ± 5.08 | 732 ±104  844 ± 43  760 ± 59  759 ± 54  754 ± 40 | 5.67 ± 0.46  7.00 ± 0.53  5.57 ± 0.40  6.69 ± 0.42  6.95 ± 0.62 | N/A | [30] |
| Royan et al. (2018) | rHDPE/RH | 70/30  70/30  70/30  70/30 | -  Alkali (0.5 M NaOH)  Acid (3:1 (v/v) ratio of sulphuric and nitric acids)  UV/O3 | 17.8  17.9  17.7  18.3 | 175  220  218  210 | N/A | N/A | [22] |
| Sumrith et al. (2020) | Bio-based epoxy/WHF | 100/0  70/30  70/30  70/30 | -  -  Alkali (5% solution of NaOH)  Silane (1% solution of 3-Aminopropyltriethoxysilane) | 64.6  61.4  64  65.3 | 1868.9  1844.5  2105.8  2162.2 | N/A | N/A | [31] |
| Xiong et al. (2020) | PBAT/lignin | 100/0  60/40  50/50  40/60  60/40  50/50  40/60 | -  -  -  -  Methylation | 23.70± 1.51  14.41 ± 0.66  13.33 ± 0.58  12.78 ± 0.36  19.48 ± 0.71  13.89 ± 0.86  13.73 ± 0.53 | N/A | 816.49 ± 52.95  378.94 ± 10.21  55.12 ± 8.75  37.81 ± 5.91  545.08 ± 56.78  308.21 ± 42.68  144.12 ± 49.25 | N/A | [32] |
| Jaya et al. (2020) | LDPE/RH | 100/0  95/5  90/10  85/15 | -  Alkali (5 wt% NaOH) | 7.8  9.0  9.8  10.2 | 50  64  77  82 | 148  68  52  50 | N/A | [33] |
| Azam et al. (2020) | rHDPE/RH | 50/50  50/50  50/50  50/50 | -  Alkali (0.5M NaOH)  Acid (3:1 (v/v) ratio of sulphuric and nitric acids)  UV/O3 | 5.8  10.83  6.0  7.0 | 418  858  485  530 | N/A | N/A | [34] |
| Nanni et al. (2021) | PBS/GS | 90/10  90/10  90/10 | -  Acetylation (1:10 (v/v) ratio of pyridine and acetic anhydride)  Silane (1 wt% of MPTMS) | 25.4 ± 1  26.8 ± 1  26.3 ± 1 | 722 ± 2  732 ± 6  724 ± 5 | 168 ± 109  274 ± 32  153 ± 98 | N/A | [35] |
| Zaman et al. (2021) | PP/BBF | 100/0  90/10  80/20  70/30  60/40  50/50 | -  Alkali (5% solution NaOH) | 28.9  32  34  36  38  37 | 575.7  590  800  920  1150  1050 | N/A | N/A | [36] |
| Zaman et al. (2021) | PP/BBF | 100/0  90/10  80/20  70/30  60/40  50/50 | -  Acetylation (toluene, acetic anhydride, 60% perchloric acid) | 28.9  33  35  39  43  41 | 575.7  675  825  1015  1475  1235 | N/A | N/A | [36] |
| Yang et al. (2023) | PLA/WFs | 75/25  75/25  75/25  75/25 | 2wt% KH550  4wt% KH550  6wt% KH550  8wt% KH550 | 26.5  23.5  28  27.5 | 765  780  790  795 | 5.7  4.6  4.8  5.0 | N/A | [37] |
| Yang et al. (2023) | PLA/WFs | 75/25  75/25  75/25  75/25 | 2wt% KH560  4wt% KH560  6wt% KH560  8wt% KH560 | 26.0  29.0  26.5  25.0 | 835  825  830  820 | 4.7  4.9  4.8  5.1 | N/A | [37] |
| Yang et al. (2023) | PLA/WFs | 75/25  75/25  75/25  75/25 | 2wt% KH570  4wt% KH570  6wt% KH570  8wt% KH570 | 26.5  27.0  26.5  25.4 | 820  820  805  795 | 5.1  5.3  5.1  5.2 | N/A | [37] |
| Perumal et al. (2023) | PBAT/CS | 100/0  60/40  60/40 | -  -  Acetylation (acetic anhydride and 50% sodium hydroxide) | 28  8.4  7.28 | 22  95  101.01 | 2500  975  107.5 | N/A | [9] |
| Perumal et al. (2023) | PBAT/CS/MAH | 60/40/2 | Acetylation (acetic anhydride and 50%  sodium hydroxide) | 15.47 | 95.30 | 170.81 | N/A | [9] |
| Yang et al. (2024) | PVC/Wheat straw | 50/50  50/50  50/50 | -  Alkali (3% NaOH)  Alkali (6% NaOH) | 26.8  28  27 | N/A | N/A | N/A | [38] |
|  | PBAT/RH | 100/0  70/30  70/30  70/30  70/30 | -  -  Acetylation (acetic anhydride and 2% sulfuric acid)  Alkali (4 wt% NaOH)  Silane (2 wt% of 3-aminopropyltriethoxysilane) | 23.29 ± 1.15  10.59 ± 0.76  15.08 ± 0.33  13.49 ± 0.92  18.83 ± 0.23 | 29.80 ± 3.00  84.68 ± 1.37  157.79±7.42  114.93±3.83  188.24±3.11 | 983.05 ± 111.67  61.04 ± 10.67  86.41 ± 8.66  34.62 ± 1.78  40.12 ± 0.04 | 1.7  96.4  95.2  94.6  95.2 | This work |
|  | PBAT/RH/MAH | 69/29/2  69/29/2  69/29/2 | Acetylation (acetic anhydride and 2%  sulfuric acid)  Alkali (4 wt% NaOH)  Silane (2 wt% of 3-aminopropyltriethoxysilane) | 20.65 ± 1.35  14.97 ± 0.19  22.49 ± 0.85 | 165.06±6.15  97.16±5.85  187.60±1.93 | 88.41±7.69  34.89±2.65  41.83±4.52 | 93.1  92.6  92.1 | This work |

*Abbreviation: PLA, polylactic acid; rHDPE, recycled high-density polyethylene; NBRr, recycled acrylonitrile butadiene rubber; RHP, rice husk powder; PP, polypropylene; PP-g-MA, polypropylene-grafted maleic anhydride; CG, coffee grounds; PHB, polyhydroxybutyrate; WHF, water hyacinth fibers; LDPE, low-density polyethylene; PBS, polybutylene succinate; GS, grape stalks; BBF, banana bunch fiber; WFs, waste corrugated paper fibers; CS, corn starch; PVC, polyvinyl chloride; NaOH, sodium hydroxide; MPTMS, 3-trimethoxysilylpropyl 2-methylprop-2-enoate; KH550, 3-aminopropyltriethoxysilane; KH560, 3-glycidoxypropyltrimethoxysilane; KH570, 3-trimethoxysilylpropyl methacrylate.*
